# Supplementary material for: Classification of sleep apnea syndrome using the spectrograms of EEG signals and YOLOv8 deep learning model
Source: PeerJ Comput Sci. 2025 Feb 21;11:e2718. doi: 10.7717/peerj-cs.2718 (PMC11888935; doi:10.7717/peerj-cs.2718)
Supplement: Supplemental Information 5 — Healthy EEG signals for sleep apnea classification. [file peerj-cs-11-2718-s005.xlsx]

## Sheet: Sayfa1
1344
1832
632
408
1720
1048
608
824
96
1576
704
1672
640
1552
224
1048
1800
208
2264
872
1272
1072
1224
1352
376
784
1088
1216
640
504
-240
1472
1736
856
728
248
480
600
80
-472
1032
80
240
1304
760
1856
880
536
-304
-240
280
1456
376
344
1816
1688
472
328
-712
1032
1032
-1392
560
2104
1840
288
1080
904
-952
440
-328
792
704
680
1928
1696
232
520
1144
1592
704
1656
1496
1328
1528
768
472
1848
1152
1208
272
352
-432
312
968
656
-400
472
528
736
760
1056
872
1136
-240
608
392
1072
-168
800
1104
768
-72
216
744
920
1216
112
808
1112
984
984
1856
736
776
-40
-584
600
928
832
-40
-264
88
512
-24
-208
448
280
32
528
592
824
64
408
752
1544
184
888
928
304
-160
560
80
920
544
296
568
800
544
-120
-8
-952
88
-88
-248
944
960
-192
456
1104
-120
200
32
200
624
784
672
1344
840
-632
-504
-56
440
40
480
416
616
312
312
368
776
536
672
1432
984
592
296
1200
768
352
440
544
424
-296
736
-160
440
200
376
304
680
360
456
-464
-392
320
440
232
536
1024
952
696
880
2008
848
88
448
272
1096
1040
160
848
1176
832
520
1352
24
88
768
880
800
880
64
328
664
-776
536
1624
688
24
-216
96
512
496
704
712
-120
440
312
104
-384
1000
64
840
648
704
-248
-8
-48
-56
392
304
200
-24
464
560
704
936
344
352
272
416
40
1088
80
216
-1152
592
544
-624
-136
528
192
288
-152
-776
-568
-480
-344
-632
-216
-128
456
-88
-408
592
-408
-288
-512
-1248
-528
-288
24
-216
-256
-1344
-32
-160
-768
-664
272
-440
-1808
-656
-1032
-48
-120
-120
-576
-288
-856
-1344
280
-376
-232
-840
312
136
1080
368
544
480
464
768
528
400
312
256
168
-8
520
-480
-328
-232
-792
-56
592
416
208
592
456
504
488
1072
1128
848
176
568
616
136
408
592
248
200
416
-40
272
728
1088
1144
1064
160
328
80
872
1152
1112
856
272
-272
-56
568
608
496
880
1152
1064
920
744
344
360
-232
80
624
688
456
912
744
816
736
952
1128
1648
-232
-224
624
-1592
-2064
-592
360
328
1784
896
144
-1144
-1336
440
1088
280
1304
552
624
1512
952
128
96
560
-248
1104
512
584
832
1272
400
1136
-8
-232
568
1368
968
-224
448
1000
872
104
1704
392
152
-184
1608
2320
-272
944
1728
-56
-176
1000
-392
-1184
352
72
272
1320
320
-3392
-1128
352
416
168
-736
-864
-3296
-2344
1496
1656
-992
-920
-648
-2376
776
-1168
-504
-1800
-1280
-1736
-480
-136
-584
568
-1544
-1072
-2656
-8
-1544
-648
-1760
1200
-1912
288
-1120
-584
-1544
672
-616
-1088
-624
-2112
-96
-864
-2224
-1424
-96
-112
-1296
-80
-1816
-392
-416
-528
-840
-176
112
-1536
-1000
632
592
-648
704
-1784
-512
-272
296
88
-456
608
-1096
-392
368
-504
-1376
-816
-280
-648
-16
-256
-1032
-2512
296
320
632
-296
512
-912
96
-496
936
-432
488
-480
976
-424
-120
424
336
160
32
416
48
-160
-496
-216
1208
-160
160
488
-8
-256
408
-120
384
416
616
784
1104
1224
1288
64
-136
312
536
400
208
-224
-200
480
704
80
240
528
584
784
1336
1176
328
64
96
168
72
-168
64
24
-280
-16
-184
224
888
1152
768
840
1024
1168
528
112
-200
-88
696
1648
2352
40
88
-80
584
-760
160
-304
776
200
-48
200
984
312
-320
64
424
616
1016
1112
920
352
-176
384
344
288
168
416
1128
1152
944
264
808
344
520
872
864
184
-512
56
-808
672
136
32
608
704
1248
304
896
-448
-328
472
1072
-328
-280
-8
-216
40
32
-368
176
-296
-304
-664
592
-304
-592
-144
40
1000
-1264
-1680
-472
56
-536
-1232
-192
-1224
-440
-832
-8
56
-344
-1384
-392
-176
264
-8
-456
56
-432
568
-144
-344
-912
-208
72
136
648
912
-88
-112
-872
64
-976
-64
-216
-8
88
-504
128
-240
-496
-472
-144
480
264
792
312
-80
-520
312
-512
-328
-136
200
168
-48
-792
-1312
-136
-328
216
256
616
672
304
360
624
688
280
240
600
-8
424
296
48
704
184
360
216
648
56
680
232
-1072
-384
-112
-256
-832
120
-272
32
-856
-272
-176
-360
-320
496
-272
-24
680
816
760
-616
-168
56
168
-216
192
-88
-248
-296
-392
-648
48
-504
-328
-712
328
-184
-112
-360
-40
-120
320
376
184
952
656
-232
80
-128
176
224
616
192
680
760
192
-152
-480
-944
328
648
312
-896
-256
-376
544
-752
-8
-456
-64
-232
456
-744
40
-120
-152
-24
1144
536
384
-312
120
312
744
376
-728
-400
-32
416
112
208
-464
-240
-1512
-416
640
672
-992
-128
208
544
304
168
-520
-504
-672
376
-248
-256
224
80
88
424
424
192
632
600
352
112
-1120
-712
-728
-664
-536
120
-216
240
1000
128
-376
-8
416
1192
1120
704
464
536
440
736
616
184
160
96
520
-248
160
-472
320
-64
-24
-480
88
600
128
-776
128
24
504
392
520
-368
640
1160
904
1256
-40
360
560
1016
656
1192
488
-968
-192
256
448
64
-256
-296
1296
984
168
712
1512
760
736
592
872
440
-168
288
696
400
-360
560
1256
848
88
448
328
896
616
88
152
712
424
-304
-408
216
136
-48
536
-160
-472
-96
1264
-120
152
472
-232
8
296
144
-256
144
320
160
632
136
-32
368
1152
72
-632
976
688
-112
-288
-144
-648
-128
-8
-16
16
-344
-584
168
200
464
-24
336
56
-376
616
808
920
-352
144
144
1216
656
480
-192
-208
368
-104
-392
-280
-480
128
456
384
440
552
48
56
1088
64
384
176
-352
88
400
504
-424
296
-672
-264
592
-8
-96
-600
-448
-152
-184
-408
160
-40
-176
464
72
-560
240
464
-120
408
240
144
136
576
424
192
144
944
1248
704
416
320
376
-184
144
184
552
-416
-56
72
-8
-24
320
344
-264
-184
904
856
-8
-408
-304
536
-208
-456
-216
-136
96
304
584
-432
488
248
-112
192
-184
-440
136
144
-352
32
272
-440
320
-24
696
872
416
-120
-80
32
-104
232
264
464
-168
200
-56
-24
432
760
-128
-240
888
256
232
-272
224
168
424
232
696
224
-144
248
256
384
392
144
-264
-472
-160
280
-312
-960
96
160
-232
-504
-672
-576
-408
48
80
96
-136
-232
-400
-448
-1176
-1616
-496
352
144
-424
-216
-8
552
-48
392
680
760
-40
-88
-264
-728
-240
288
1064
632
536
784
344
752
376
368
-768
-312
976
32
-104
-184
176
-952
16
-64
-504
-328
-720
-368
-352
-464
408
-80
-48
-472
192
424
-72
224
248
528
616
184
128
-32
88
752
736
-208
-8
480
488
440
520
504
1576
448
464
720
944
264
256
1064
992
752
624
168
1024
496
568
-256
120
424
120
104
-24
-64
-112
208
128
-280
256
72
864
512
320
32
240
-376
-432
-152
-600
64
-32
-88
-80
-120
-248
200
512
-8
480
256
-472
328
944
976
-328
464
312
232
464
-392
48
72
-560
-320
56
-328
-408
-696
-504
-384
-608
-704
-248
-96
-640
-304
-472
464
-16
288
-104
-128
-176
-552
-192
-704
-8
-296
-904
-400
-896
-936
-1600
-584
-432
-40
-472
40
416
-8
-168
-760
-640
-208
-80
-152
392
440
320
744
104
-464
24
352
-232
336
400
-144
504
344
-8
-864
-744
-1880
-464
-216
-144
-848
160
56
-16
112
-56
280
368
-144
232
464
-120
16
-72
-8
-312
-40
-160
472
-40
-592
240
-224
-320
40
104
-120
48
-144
-152
832
-1000
-832
-640
-88
-512
-96
32
352
288
-360
-56
-48
408
200
552
1040
1080
568
-8
1128
736
1288
696
584
192
232
784
256
200
-40
632
-8
-496
688
248
168
-400
696
440
760
280
-104
64
496
672
592
-40
128
1248
928
232
688
520
376
-400
224
-40
656
448
880
424
600
560
1232
432
936
808
1344
-152
616
728
536
1296
1848
992
848
1104
224
128
568
-256
-104
-720
-592
-584
616
-568
528
-568
-104
568
328
-8
-312
-216
-536
-96
-184
208
-72
-408
720
24
-280
-208
-80
-1104
-888
-512
160
16
-544
-1176
-488
-800
-464
-88
-848
224
632
400
-320
-128
368
-328
272
-536
-432
-360
256
-152
-560
928
296
-408
-208
248
-504
-136
328
536
80
-432
320
-208
-16
456
512
-16
280
56
520
216
-456
40
536
576
448
-648
-104
584
424
-728
144
-136
232
456
408
-208
-496
-160
632
384
104
-288
336
552
16
-8
856
680
720
432
-160
-192
-664
-1352
-1280
-2016
-416
184
608
-808
-176
-1120
-520
-296
-400
-560
-408
-320
-640
-352
-1096
-160
16
-336
-1160
-336
-808
-728
296
-56
-1040
-336
-8
-536
-368
-776
184
936
200
-664
-112
520
200
664
-448
160
640
544
-272
-688
-1056
-904
16
-1024
720
592
-528
-592
544
-472
392
1112
-8
-136
688
248
384
784
240
-384
104
128
672
-64
-480
-136
320
-656
-328
-264
-24
-200
-176
-848
-1008
104
256
544
488
712
344
1032
296
544
896
520
-184
1032
24
-104
-192
80
-576
-712
128
-24
1104
192
728
368
-176
-624
968
432
296
-816
-200
600
-120
-464
528
184
-360
392
2008
560
872
1336
352
1176
912
1192
904
1160
1112
976
-16
1456
1088
1664
800
880
-112
224
160
344
-104
368
1080
808
720
784
232
376
1296
448
-32
1504
824
912
2032
1320
1040
32
1248
600
1152
320
64
320
-432
-248
-184
168
-520
-656
-504
-56
-520
-1448
-400
-1264
-752
-696
-896
-488
-784
-232
160
168
-1000
-504
-1232
-496
56
-744
-184
-1632
-944
-1776
-1088
-1680
-736
-584
-984
-96
-296
272
248
264
48
-712
-624
-400
808
-544
-152
144
-120
-720
264
-656
744
-48
296
-464
-488
-352
72
560
-16
-8
-880
-520
-576
256
-656
296
32
512
728
-264
-176
224
808
120
-184
200
152
312
280
-312
-248
144
-168
144
456
-184
56
368
-832
336
-328
360
-584
256
-72
-240
-272
-144
-176
-208
-56
-296
-888
-624
-640
-696
-720
-584
-544
-128
-368
-8
368
552
-24
-416
-880
-1040
-120
24
488
472
296
-152
40
88
-200
144
96
232
368
-144
240
200
680
120
216
176
-80
-504
504
56
352
632
-200
224
-8
224
-480
-168
-264
-32
-272
-128
-736
-192
96
-320
-136
-664
288
-264
272
400
264
-152
48
-152
-320
-824
-240
-104
72
-736
-1656
-368
80
-384
-488
-32
616
-536
-72
232
648
312
176
-136
40
-40
-728
-152
24
288
152
128
-424
-472
184
-328
-56
-560
-368
-480
-1096
-352
-232
-800
-632
-264
-640
-664
80
-160
40
152
-240
[truncated: 998,000+ more rows]
