# Supplementary material for: Classification of sleep apnea syndrome using the spectrograms of EEG signals and YOLOv8 deep learning model
Source: PeerJ Comput Sci. 2025 Feb 21;11:e2718. doi: 10.7717/peerj-cs.2718 (PMC11888935; doi:10.7717/peerj-cs.2718)
Supplement: Supplemental Information 6 — Mild apnea EEG signals for sleep apnea classification. [file peerj-cs-11-2718-s006.xlsx]

## Sheet: Sayfa1
-184
-64
-336
-304
-240
40
-64
568
112
208
80
648
296
248
-112
192
32
-8
-232
16
-376
-520
-648
-392
-608
-920
-560
-1512
-952
-728
-768
-1464
-1576
-1592
-1648
-1208
-1784
-2096
-1632
-1136
-1312
-1776
-1376
-1880
-1096
-1352
-1176
-1256
-1208
-1440
-1312
-1232
-600
-960
-1064
-1432
-1672
-1408
-904
-696
-384
-32
144
600
360
736
592
560
384
696
552
336
-208
-912
-328
120
1064
1200
960
1096
1712
1192
1216
1048
1024
872
736
712
1024
816
784
1000
1096
592
-208
-256
544
1392
1000
1608
920
928
360
672
552
1152
1360
1624
1688
1448
1512
1184
1080
880
808
960
784
1296
856
592
528
704
472
936
832
616
680
456
-8
824
-24
-16
-248
-224
-216
-72
248
272
896
960
1064
1088
1288
1104
728
1096
752
768
160
208
416
1320
1216
1312
440
768
1008
1184
664
584
584
-8
656
80
360
-88
-184
-64
-208
8
320
560
224
856
904
1000
848
512
440
808
584
464
408
840
680
992
720
728
1024
400
408
248
424
408
616
648
32
-112
-160
352
248
-176
-456
168
664
320
424
424
480
120
336
888
184
280
232
1264
816
-200
-1112
-528
152
1128
768
512
240
1016
240
248
600
728
184
496
424
8
24
392
456
24
-8
808
272
304
264
600
448
1032
944
992
968
984
904
696
480
584
568
960
656
792
1120
616
168
224
544
296
408
-128
248
320
408
504
520
32
-256
-344
-408
80
-392
-272
-352
128
-112
248
-88
-256
136
416
40
-168
496
568
232
424
888
80
280
600
128
80
496
816
272
496
-80
640
128
136
360
176
-128
600
472
344
-288
112
-400
544
136
240
240
-16
328
568
672
216
568
456
168
-8
64
640
1024
192
528
448
752
336
784
-344
-664
-1184
-8
240
472
1080
904
584
672
880
848
568
696
264
224
216
160
168
136
240
-104
-288
-128
144
-32
336
-56
56
-88
-112
-56
16
232
544
152
-232
448
488
136
-136
-56
-568
104
168
536
576
352
336
792
440
312
968
592
-152
-72
416
48
112
200
648
1192
1120
376
512
936
232
144
-8
-96
-416
24
128
-64
296
-176
-40
176
-8
88
664
168
-80
432
360
496
448
360
280
704
712
496
488
272
296
24
-136
40
-288
40
200
400
-336
528
64
176
216
-32
288
744
80
152
528
280
560
704
808
832
920
1024
1336
1040
-344
-296
-392
944
944
1304
120
600
712
912
808
864
824
472
512
728
224
408
272
600
504
888
216
-152
248
336
416
488
544
392
344
288
48
256
72
-152
344
-232
312
-8
696
264
216
152
448
304
-104
704
856
696
248
608
336
-8
232
264
584
200
160
-136
112
-104
344
424
496
424
792
760
696
528
648
880
536
488
112
232
-40
24
-160
256
-32
64
184
152
272
240
304
80
-232
344
392
168
-208
88
264
104
-248
-344
-408
-680
-536
-936
-424
-552
-168
-512
-680
-360
112
368
-160
456
552
592
448
528
840
352
736
-24
-72
-680
-792
-1152
-24
456
584
224
288
144
72
248
456
104
144
280
792
240
192
712
648
432
72
520
744
872
272
296
472
640
920
904
88
376
-200
216
-104
-56
120
136
792
176
496
-168
-8
128
48
-72
160
-72
-512
-184
-576
-304
-584
-696
-496
-96
112
264
-144
-464
-120
-264
216
104
136
120
-32
-184
-288
-360
-568
-624
-272
24
464
224
464
136
-80
-296
-184
208
184
32
-752
-304
32
-40
216
168
352
104
40
120
272
-272
296
632
632
240
-152
-96
280
496
184
-8
120
472
608
1296
640
496
-160
808
680
744
1000
744
728
208
272
304
-424
-1552
-1240
-88
616
416
-128
-384
-216
-416
416
56
48
-8
-8
312
496
256
-208
-24
-24
-384
-200
-24
200
-232
56
416
-56
-24
328
-304
-720
-768
-760
-848
-408
-280
88
248
960
112
296
424
464
-296
-8
-32
-312
-424
-128
240
120
152
-512
-136
-160
72
-232
-312
-736
-416
-648
-568
-232
-888
-280
-424
-152
336
592
-312
152
816
496
72
424
144
-88
272
496
392
400
176
-440
-240
168
-64
304
56
-16
-528
376
640
40
-88
16
-488
-88
808
-240
392
64
264
176
384
168
240
336
-272
320
-40
-104
40
560
136
336
56
-192
152
120
272
-72
-1160
-984
-224
648
-8
528
448
80
-352
-104
-104
-240
-152
176
-128
-80
-280
80
72
-168
56
-368
-112
-208
240
-272
-512
-384
-472
-360
-848
-968
-768
-960
-1048
-136
-408
-968
-832
-640
-352
-416
-520
-856
-488
-736
-696
-568
408
-768
-184
-112
-464
-1048
-328
-680
-1024
-576
-344
-776
-256
-656
-432
-784
-416
-680
-920
-928
-736
-888
-688
-568
-752
-1216
-32
-672
-568
-576
-880
-1504
-696
-736
-856
-624
-240
-1224
-432
-1128
-312
-880
-272
-48
-512
-408
-1016
-136
-280
-72
320
136
456
-208
432
176
72
168
896
552
208
120
592
288
72
-144
976
160
472
512
-224
-1144
-528
368
800
256
368
456
408
112
512
336
-208
512
344
-16
608
520
168
104
616
336
352
288
168
448
56
232
96
-56
-128
-160
488
344
280
-40
440
456
216
432
488
480
296
832
808
584
528
272
552
696
528
872
496
912
344
1256
848
1328
760
696
544
1112
1248
872
416
736
408
784
624
304
480
968
896
608
472
1176
752
-56
112
968
360
752
336
656
344
384
320
752
872
168
-104
440
328
656
328
512
24
616
640
312
-128
280
408
528
192
88
808
56
632
544
880
128
176
176
288
704
72
176
-120
344
832
544
536
-304
-88
1048
1320
496
504
968
296
-56
672
760
-8
80
648
448
200
520
312
304
896
864
528
696
832
464
584
768
-40
-264
736
1072
304
344
672
168
152
752
264
1016
496
176
-408
-48
-256
432
256
248
328
208
40
616
472
328
16
648
400
480
344
592
384
176
288
720
360
-936
392
272
792
240
128
800
256
-120
360
744
848
432
552
-152
440
592
232
-264
400
488
1096
944
1136
1072
1424
1392
1136
1432
1656
1152
1352
1424
1288
1576
1280
1160
1480
1584
1016
992
1128
1440
1200
1216
1624
1088
864
360
544
928
1152
736
584
472
160
-160
-88
-384
-336
632
1368
1832
1888
1408
1856
1760
2000
2120
2448
1640
1544
1960
2112
1920
1736
1336
1232
1704
1640
1952
1784
1688
1248
1392
1152
1320
1616
1704
1160
864
1512
1600
1624
1296
1160
1104
1000
1040
1080
1032
792
952
1192
1184
1192
1248
1224
1208
1248
1528
1248
1120
952
856
1016
816
1064
912
504
696
808
880
1096
1016
1072
1432
1720
1344
952
1640
2104
904
-376
24
720
1224
2880
2400
1344
1664
784
-720
-104
992
936
2536
1064
2672
3560
1672
-64
2224
2152
3472
4144
3200
4400
4008
1232
1304
4704
3688
2664
3296
4960
2632
1688
3008
4496
2792
2992
3568
3248
2648
1920
1328
2048
3328
2984
3200
3384
2640
2808
2784
3176
2896
2856
2584
2968
2800
2352
2336
2264
1856
2216
2096
2064
1832
1488
1736
928
1536
1336
1968
1552
1696
1544
1808
1768
1464
1112
544
856
1120
992
1192
816
1152
1320
1048
648
376
328
216
368
368
432
248
-112
-8
-144
-24
-264
-216
-704
-752
-648
-24
144
-8
-264
-104
168
-24
-424
-208
-296
-360
-432
-512
-384
-80
184
-88
224
136
352
32
-592
-1064
-352
192
-400
-232
-64
104
-128
280
16
-8
176
-328
-576
-104
-360
-616
-672
-456
104
-240
-392
-232
120
56
-296
-232
-832
-776
-1008
-448
-432
-200
-464
-752
-1112
-520
-240
-8
-416
-328
-608
-632
-712
-744
-1192
-640
-40
72
-8
-152
-120
-480
-144
96
144
-272
-152
56
-56
-360
-40
-448
-248
-160
104
464
464
384
152
296
56
392
440
-128
-656
-528
-408
-248
-376
-584
-736
-456
-368
-296
-352
-424
-392
-344
-232
-392
-608
-1096
-1152
-1504
-1664
-2096
-1864
-1936
-1736
-1512
-1112
-1304
-1560
-1712
-2136
-1920
-1856
-1864
-2136
-2216
-2184
-2440
-2168
-2296
-2216
-2264
-2488
-2072
-1968
-1752
-1672
-1272
-1384
-1184
-1560
-1440
-1176
-1152
-1064
-928
-1032
-1104
-704
-752
-552
-200
-144
-600
-864
-664
-656
-408
-168
-616
-968
-704
-176
-296
-280
-632
-824
-1208
-1096
-824
-736
-1376
-2280
-1984
-1176
-296
-240
-696
-856
-776
-672
-752
-488
-752
-784
-784
-728
-736
-632
-408
-584
-552
-840
-408
-704
-768
-1240
-976
-888
-600
-728
-736
-792
-528
-456
-992
-1184
-1800
-1416
-1520
-584
-424
-456
-368
-848
-800
-544
-496
-680
-512
-704
-168
-240
-640
-1032
-376
-264
-200
-616
-720
-520
-24
-648
-608
-728
-624
-1248
-1304
-1368
-1064
-1184
-1784
-1624
-1216
-992
-1048
-1064
-872
-832
-712
-776
-624
-368
-504
-912
-1192
-888
-912
-984
-888
-896
-872
-432
-456
-904
-776
-480
-488
-360
-344
-280
-536
-824
-888
-768
-360
-360
-376
-320
-176
144
176
-56
-320
-224
-552
-480
-968
-1480
-1688
-1520
-784
216
312
352
-24
-40
-120
-24
64
72
-416
-632
-216
-616
-600
-176
-208
-464
-696
-760
-600
-184
64
8
-208
-304
-456
-1016
-992
-672
-456
-368
-144
-232
-488
-256
-600
-472
-728
-1000
-768
-992
-1176
-1416
-1168
-1424
-872
-736
-320
-16
-176
24
144
368
152
240
-320
-496
-312
-224
-328
-480
-512
-424
-368
-400
-208
-488
-744
-768
-576
-408
-376
-272
-232
-200
96
80
-272
-552
-392
-640
-688
-584
-720
-944
-888
-816
-560
-344
-216
-512
-624
-664
-416
-216
-504
-760
-664
-624
-656
-584
-752
-488
-472
-440
-464
-464
-616
-504
-408
-456
-248
-288
-736
-480
-752
-984
-1208
-1104
-272
200
-368
-816
-736
-888
-736
-720
-896
-784
-792
-656
-888
-904
-840
-528
-280
-440
-240
-328
56
216
216
-64
-224
-152
-328
-440
-504
-488
-536
-360
-8
-8
-200
16
-72
-64
-280
-264
-392
-392
-664
-392
-48
-304
-112
48
144
104
408
520
208
128
-128
-480
-744
-512
-72
-32
536
704
472
-80
-40
-280
-464
-608
-368
-744
-904
-912
-800
-480
-336
-416
-536
-424
-328
-72
-16
-32
128
112
80
240
48
-360
-88
-208
-304
-32
296
576
712
408
560
712
544
88
88
144
432
488
488
616
696
656
536
816
680
600
328
312
200
176
-88
64
-224
-416
-176
16
656
936
1040
352
360
496
456
432
120
232
320
432
304
144
360
280
384
304
208
-184
-8
136
-96
-160
-136
-168
16
144
248
520
440
64
-208
-128
-96
-24
-192
-192
-504
-512
-544
-440
-688
-392
-304
-224
-24
224
72
-8
352
-48
-56
80
160
-24
-80
184
56
280
-424
-208
240
288
392
328
232
312
600
488
152
192
128
160
248
264
144
-216
-424
-384
-216
-72
-376
-328
-144
440
288
160
136
56
-176
[truncated: 998,000+ more rows]
