# Supplementary material for: Classification of sleep apnea syndrome using the spectrograms of EEG signals and YOLOv8 deep learning model
Source: PeerJ Comput Sci. 2025 Feb 21;11:e2718. doi: 10.7717/peerj-cs.2718 (PMC11888935; doi:10.7717/peerj-cs.2718)
Supplement: Supplemental Information 7 — Moderate apnea EEG signals for sleep apnea classification. [file peerj-cs-11-2718-s007.xlsx]

## Sheet: Sayfa1
16
176
176
344
528
-432
-200
-72
144
80
400
-112
-392
-72
-112
-144
-384
-240
-16
-160
-8
208
72
-352
-328
-384
-872
-224
72
-112
-248
416
-48
-368
-264
-320
112
-96
-240
24
120
-824
-200
48
-184
344
208
-472
64
256
512
320
-136
-536
-32
-784
-528
-288
-328
72
304
-544
-504
-200
-392
208
-208
112
304
512
-136
-8
-168
-304
-304
-768
128
456
360
-168
-232
-784
-488
336
584
-96
-144
-24
56
152
-392
-944
-488
240
-64
-272
-416
-160
-376
-304
-224
-96
-176
32
248
216
224
-360
-216
248
816
512
-40
-864
-872
-216
48
-384
-448
-304
136
224
-64
376
856
288
-72
368
144
584
664
272
32
496
544
464
416
-16
-128
-248
400
408
72
-792
-984
-328
-168
-64
-80
-312
-232
696
1104
608
648
184
248
616
936
944
912
688
616
968
856
704
824
752
280
128
240
800
808
824
568
832
1144
1240
928
472
256
768
536
480
288
48
112
464
296
-448
280
96
-296
-608
216
80
-168
-440
-400
-208
-376
-960
-792
-312
-112
-304
-136
-176
-296
-8
-8
200
32
-16
-472
-208
-56
16
-128
-80
168
184
208
424
824
296
-200
312
648
520
296
240
-192
-392
-736
-552
-504
-904
-1208
-664
-616
-240
40
-112
-40
368
24
-304
-224
-608
-408
-248
-240
104
-280
-432
-208
-8
288
664
176
-840
-1816
-1744
-2072
-2992
-3632
-3328
-3760
-4000
-4664
-4512
-4384
-3664
-3720
-3232
-3872
-4032
-3872
-3128
-2560
-1704
-1416
-1808
-1976
-1992
-1680
-1704
-1656
-1320
-1240
-1032
-1152
-680
-704
-1000
-824
-16
1016
848
-56
-272
-136
-192
80
400
576
-24
48
-8
352
440
736
464
-104
-480
-632
-768
-648
-184
-128
-152
80
512
336
-192
264
32
272
464
872
544
728
272
-288
112
-56
-128
56
104
-752
-456
-168
-440
-464
264
576
488
792
904
256
272
576
104
-296
-128
272
216
320
120
-176
-744
-552
-496
-192
-448
-776
-464
264
368
-8
-112
168
-24
-312
-416
-224
-288
-176
-8
424
-48
-104
-144
-200
-168
96
-456
-240
-40
24
464
1088
496
104
-280
40
264
312
-200
344
808
600
-344
104
56
128
-136
-920
-48
744
464
-280
-56
192
712
360
64
712
1312
1664
1104
1080
912
1352
1320
1736
1520
2072
1848
1840
1360
1872
1752
1728
1792
1448
1176
1376
1760
832
1520
2008
2096
1592
2128
1432
1000
1408
1680
768
680
1448
1648
1432
1368
1456
1456
1872
1912
1528
1744
2048
1904
1640
1520
904
1760
1952
1160
728
704
856
952
992
1288
1400
1088
1048
1424
832
872
800
664
320
592
88
256
-152
16
24
8
-944
-640
-608
-896
-1088
-632
-544
-744
-792
-648
-504
-248
440
872
504
120
-8
376
608
376
488
288
632
528
392
-272
-144
584
584
896
616
456
-8
240
80
376
232
320
568
440
552
456
488
296
648
328
-224
-8
-224
360
-216
240
704
600
536
880
1168
608
760
624
400
552
488
384
64
56
208
-64
240
600
848
872
888
616
720
856
632
1104
1048
704
328
104
-96
-592
368
144
296
40
32
72
704
824
552
312
16
240
144
136
352
616
488
232
192
384
264
480
328
24
384
752
664
56
264
96
120
-8
272
304
328
656
-24
488
1168
1616
1240
392
304
56
400
-200
-304
-8
464
832
968
768
320
128
-192
184
40
-240
-312
160
720
720
360
528
536
64
-560
64
48
144
-384
-568
-752
-352
-88
-208
280
200
176
-128
88
168
-8
-200
248
480
496
240
368
688
712
112
-360
-424
-312
176
616
544
480
272
208
16
192
304
64
-424
-1184
-960
-536
-56
-360
-48
-56
232
176
512
232
888
1072
896
624
280
-88
-240
-128
-96
-104
56
392
672
520
656
720
192
488
656
432
232
384
448
344
504
32
256
200
592
896
880
576
392
88
-272
152
664
424
48
72
168
664
936
576
56
344
560
392
-8
-88
-272
120
480
864
176
-584
-472
-200
-456
-608
64
376
360
-8
552
952
896
704
456
328
728
680
-72
-272
568
696
456
80
144
-528
-336
-328
152
216
712
80
-192
-400
-120
-24
-744
-64
520
416
-488
-688
-1280
-1488
-1872
-2256
-2616
-2792
-3032
-2432
-1672
-1416
-1400
-1144
-1160
-1224
-1552
-1840
-1920
-1680
-1584
-1352
-1328
-1224
-760
-520
-744
-1584
-808
40
432
352
-8
-352
-616
-408
-328
-536
-704
-512
-656
-368
-384
-488
-152
80
120
80
136
248
752
792
576
448
336
200
224
184
-144
32
432
416
272
616
16
-368
-200
-232
-288
72
416
568
552
256
144
232
128
344
344
80
-368
-640
-696
-504
-144
136
624
392
168
-184
-816
-856
-632
-568
-888
-720
-72
128
360
120
264
248
336
80
264
384
320
584
440
352
408
-80
232
272
544
336
472
408
360
528
176
464
200
528
1112
1120
688
744
784
504
952
344
-344
264
376
440
552
568
64
296
728
408
184
784
1048
736
-88
-80
-296
-56
-496
-584
80
312
640
368
216
432
800
320
-8
112
336
968
904
80
592
832
784
-88
-368
-544
-104
456
384
184
-72
376
392
504
64
232
128
616
520
616
-536
-712
240
472
392
56
608
816
816
472
320
-536
-336
104
104
-688
-328
-264
64
936
1080
624
552
856
1104
1000
880
1024
880
992
512
248
-232
416
136
-576
-728
88
392
120
-88
168
400
936
624
896
1192
1120
456
256
400
512
272
272
504
792
424
592
728
976
752
296
352
768
1232
560
968
520
648
512
1208
1200
768
496
840
976
1112
696
472
144
-184
208
280
576
576
728
320
504
728
520
400
16
528
528
816
504
776
336
288
416
992
472
240
240
320
456
576
856
600
560
312
24
72
-352
88
-136
272
-168
288
-112
144
-8
24
-8
64
48
-120
-96
-680
-1152
-1312
-928
-912
-1464
-1944
-2392
-2400
-2488
-3000
-3264
-3504
-3184
-3664
-3920
-3912
-3640
-3280
-2840
-3264
-3864
-3984
-3752
-4224
-4584
-4432
-4080
-4088
-3840
-4376
-4144
-4600
-4768
-5024
-4656
-4816
-4784
-4368
-4408
-4288
-4656
-4864
-4792
-4968
-5240
-5456
-5136
-4912
-4928
-5232
-5592
-4848
-4728
-5080
-4928
-4088
-4088
-3912
-3840
-4120
-3976
-4128
-4184
-4160
-4184
-4288
-4264
-4072
-3840
-4168
-3864
-3688
-3976
-4400
-4088
-4120
-3976
-3720
-3456
-3776
-3456
-3520
-3032
-2800
-3152
-3392
-2944
-2752
-3160
-2640
-2704
-2392
-2208
-2136
-2184
-2480
-1912
-1808
-1840
-2488
-2384
-2904
-2840
-2808
-2264
-2160
-2128
-2352
-2512
-2880
-2952
-1952
-1888
-1616
-1848
-1480
-1832
-1528
-1864
-1760
-1792
-2336
-2560
-2696
-3176
-3256
-2416
-1848
-1688
-1744
-1624
-1576
-1896
-1624
-1736
-2112
-2592
-2128
-1552
-1160
-1352
-1296
-1248
-880
-968
-1416
-1368
-1728
-2216
-2944
-2304
-1592
-968
-824
-800
-912
-1144
-1312
-1504
-1776
-2096
-1696
-1064
-640
-1328
-1256
-1088
-600
-480
-616
-848
-1232
-1000
-1240
-1120
-1552
-1552
-1456
-1200
-1368
-976
-776
-712
-976
-1152
-1048
-928
-920
-712
-504
-152
-328
-608
-992
-1072
-1320
-1560
-1352
-1456
-1712
-1152
-584
-304
-328
-144
-280
504
472
56
-360
-264
-968
-1120
-752
-456
-432
-288
216
504
432
416
984
984
40
-528
-72
64
104
-8
536
864
1096
1064
1032
1040
880
800
-232
-184
456
608
-632
-368
-48
16
488
536
576
288
656
472
264
456
592
552
-8
408
1008
1032
1024
408
272
416
328
-552
-80
984
1272
1096
928
600
1216
1232
1704
1784
1520
1008
88
304
680
1136
1016
1160
1120
1072
1176
1392
1520
912
912
584
-272
-296
248
344
176
888
1080
1208
1408
1912
1968
1200
-24
-768
-1648
-1912
-768
232
248
88
1296
1592
1616
1296
1328
560
512
192
-368
-96
616
632
440
848
1056
1432
1608
1488
1272
1080
864
-304
-432
-120
208
560
632
544
712
1440
1376
1656
928
200
344
16
-56
296
408
64
544
920
1224
1840
2328
1616
984
424
-128
-664
-552
-808
-120
768
976
840
976
1560
1968
1712
992
632
528
-176
-528
48
136
272
-8
400
800
1384
1992
1624
992
1344
1256
368
480
1136
1072
432
816
768
1080
872
1040
752
1168
1280
1016
728
888
1208
1304
1016
944
776
1280
1480
1736
1832
1496
936
360
136
632
1008
1144
912
1488
1664
1640
1280
1520
744
536
88
-120
424
992
1000
872
1456
1792
2072
1960
1568
944
288
-392
-864
-504
304
560
1368
2312
2128
2176
1680
1624
1616
1408
1112
1464
1176
440
456
704
784
624
568
904
936
960
1008
888
1056
920
752
864
1200
1272
1368
1608
1960
1672
1408
1304
784
-72
-184
216
-88
-736
-648
16
104
896
816
1352
1552
1672
992
1320
960
728
400
792
448
624
-48
-344
864
1008
856
152
-216
-56
784
448
384
1024
784
496
504
584
936
1240
424
-352
-208
-88
24
256
192
472
432
520
624
776
568
-128
-80
-56
672
136
-16
408
1192
1624
1624
1472
1160
1584
1376
944
648
576
752
744
1152
1520
1400
1352
1064
1696
1632
1312
-448
640
1256
3152
3488
2344
1648
2960
3536
1624
2104
4800
8136
-432
2504
8736
4832
4712
8672
6648
1496
10272
10120
6880
8104
10344
10120
10168
10136
8272
8448
9640
10216
10144
10152
10152
10144
10160
10136
10152
10152
10160
10136
10152
10152
10152
10152
10168
10152
10136
10152
10160
10152
10144
10144
9288
9032
9976
10112
10144
10152
10160
10128
10048
8904
10320
8664
8008
6728
6808
6640
6112
5552
6232
6600
6640
5872
5944
5904
6224
5984
6064
6272
5816
5408
4184
4232
3888
4552
5320
5112
4616
4416
4088
3776
3960
3728
3560
4416
4384
3720
3888
4080
4256
3792
3080
2984
3432
3464
3432
2968
2624
3240
3704
3816
2824
2728
2912
2800
2376
2008
1912
1808
2440
2088
2056
2560
2800
2448
1896
2608
2560
2760
2312
2208
1768
1688
1664
1192
1248
1200
1000
760
1432
1800
1696
1880
2008
1248
1192
1360
1200
968
496
376
1584
1840
1336
936
1608
1192
1168
688
792
1224
1216
936
536
872
632
928
1176
1048
584
264
624
344
568
1208
1376
1072
872
488
720
840
736
624
520
120
-416
168
-88
-160
-624
-280
-248
112
16
-8
136
176
840
1136
600
-64
256
1040
736
48
-368
120
8
-384
-1000
-400
-144
400
96
760
864
1064
584
320
304
672
720
472
16
-200
-256
24
-448
-128
192
712
560
464
440
776
560
-216
-728
-848
-800
-552
-760
-1520
-1064
-272
56
-344
-680
16
360
320
-464
-592
-944
-952
-256
-1040
-664
-48
480
40
208
-368
-320
56
-576
-776
-264
-128
-856
-1224
-1168
-1072
-632
-1088
-976
-800
-240
-368
-128
-56
-216
-144
-656
-1032
-792
-472
-952
-984
-680
-792
-328
-712
-528
-88
168
-16
-312
-120
-408
-752
-768
-592
-704
-832
-376
-152
-56
-160
-464
-120
-112
-16
-672
-184
-376
336
272
160
136
456
336
184
-88
-32
-816
-608
-496
-208
-240
560
312
312
752
[truncated: 998,000+ more rows]
